# Supplementary material for: Improved exciton photoluminescence of Zn-doped quasi-2D perovskite nanocrystals and their application as luminescent materials in light-emitting devices
Source: Royal Society of Chemistry journal article supplement (doi:10.1039/d3tc00406f), 2023-01-01
Supplement: d3tc00406f1.pdf [file d3tc00406f1.pdf]

## Supporting Information

# Improved Exciton Photoluminescence of Zn-doped Quasi-2D Perovskite Nanocrystals and Its Application as Luminescent Material in Light-emitting Devices

Lei Song,<sup>a</sup> Qiong Zhang,<sup>a</sup> Shahid Ullah,<sup>a</sup> Yuxin Liu,<sup>a</sup> Kangning Liu,<sup>a</sup> and Jun Dai<sup>a,\*</sup>

a. Department of Physics, Jiangsu University of Science and Technology, Zhenjiang,

212100, China. E-mail: [daijun@just.edu.cn](mailto:daijun@just.edu.cn)

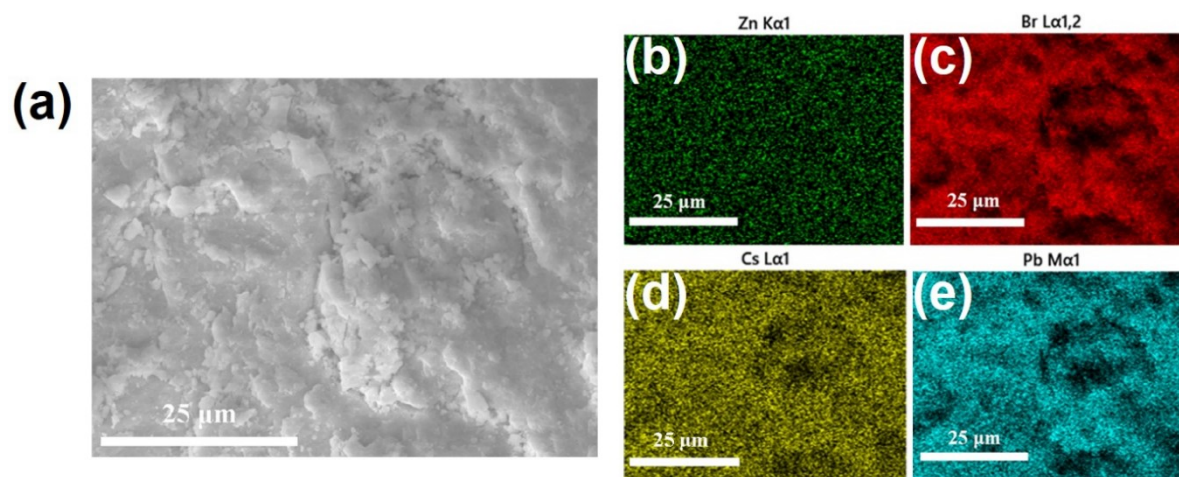

**Figure S1.** (a) SEM image of 20%Zn-PEA<sub>2</sub>CsPb<sub>2</sub>Br<sub>7</sub> NCs powders and corresponding (b-e) elemental mapping images of Zn, Br, Cs, and Pb elements.

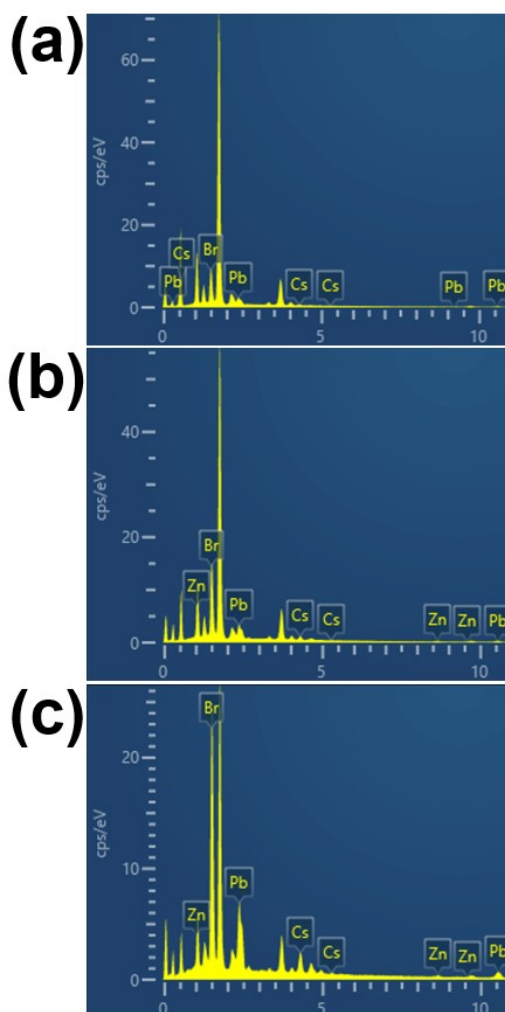

**Figure S2.** Energy dispersive spectroscopy (EDS) of (a)  $\text{PEA}_2\text{CsPb}_2\text{Br}_7$  NCs, and 20%Zn- $\text{PEA}_2\text{CsPb}_2\text{Br}_7$  NCs (b) before and (c) after repeated cleaning with antisolvent ethyl acetate.

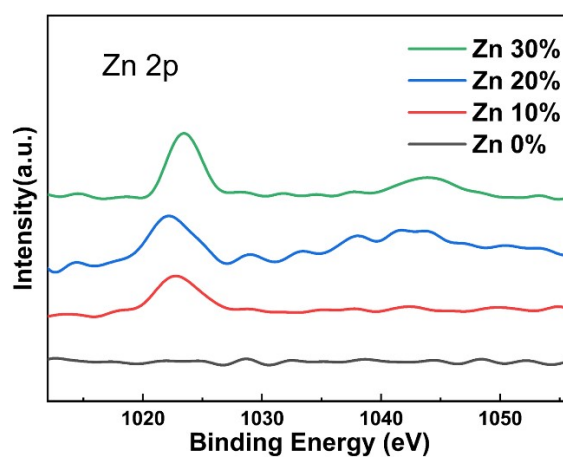

**Figure S3.** High resolution XPS spectra of Zn 2p with different proportions of Zn.

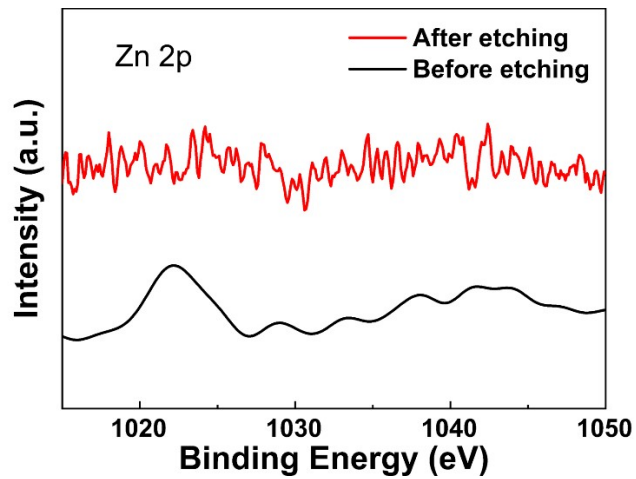

**Figure S4.** High resolution XPS spectra of 20%Zn-PEA<sub>2</sub>CsPb<sub>2</sub>Br<sub>7</sub> NCs with and without Ar ions etching.

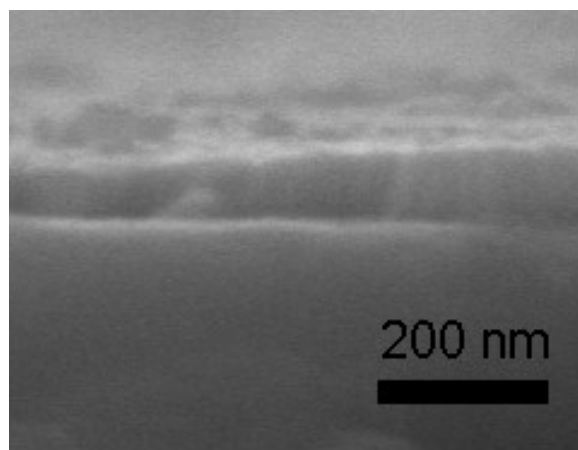

**Figure S5.** The cross-section SEM image of Al film constructed on quartz substrate.

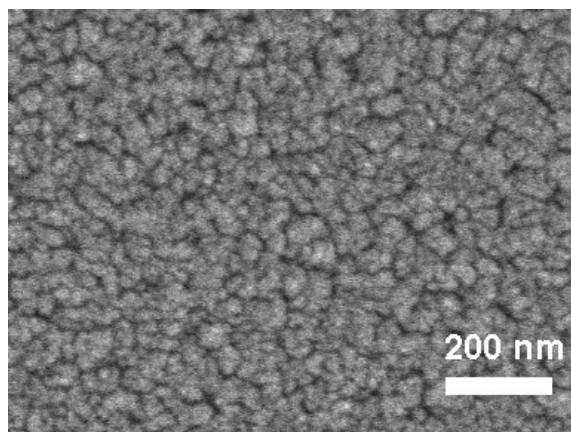

**Figure S6.** The SEM image of bare Al film morphology.

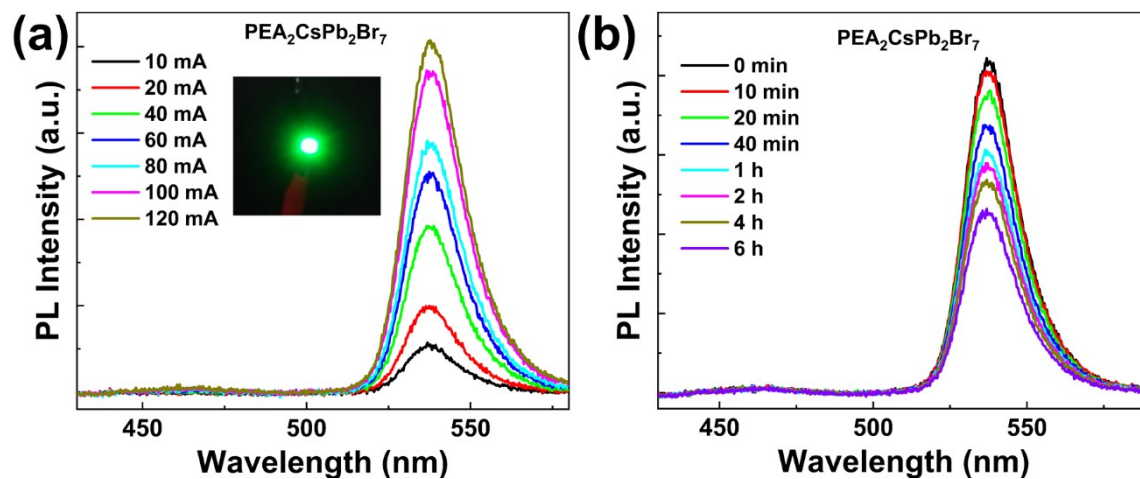

**Figure S7.** (a) PL spectra of green LED fabricated by  $\text{PEA}_2\text{CsPb}_2\text{Br}_7$  NCs at different injected currents of 10-120 mA. (b) Time-dependent PL spectra of green LED fabricated by  $\text{PEA}_2\text{CsPb}_2\text{Br}_7$  NCs at operating current of 30 mA.

**Table S1.** EDS analysis of PEA<sub>2</sub>CsPb<sub>2</sub>Br<sub>7</sub> NCs, and 20%Zn-PEA<sub>2</sub>CsPb<sub>2</sub>Br<sub>7</sub> NCs before and after repeated cleaning with antisolvent CB.

| Sample             | Atomic ratio % |      |      |     | Zn/(Zn+Pb) |
|--------------------|----------------|------|------|-----|------------|
|                    | Cs             | Pb   | Br   | Zn  | ratios %   |
| Pristine NCs       | 12.1           | 23.1 | 64.8 | 0   | 0          |
| Unwashed 20%Zn-NCs | 8.1            | 25.6 | 64.1 | 2.2 | 7.9        |
| Washed 20%Zn-NCs   | 12.0           | 32.5 | 54.4 | 1.1 | 3.3        |

**Table S2.** Atomic ratio of perovskite NCs with different ratios of Zn<sup>2+</sup> (0%, 10%, 20%, 30%) using XPS analysis.

| Zn/Pb mole feeding ratios | Atomic ratio % |       |       |      | Zn/(Zn+Pb)    |
|---------------------------|----------------|-------|-------|------|---------------|
|                           | Cs             | Pb    | Br    | Zn   | mole ratios % |
| 0                         | 13.77          | 15.14 | 71.09 |      | 0.00          |
| 0.1                       | 13.21          | 15.2  | 71.04 | 0.55 | 3.49          |
| 0.2                       | 14.43          | 14.34 | 70.08 | 1.15 | 7.42          |
| 0.3                       | 14.49          | 15.07 | 68.46 | 1.99 | 11.66         |

### Calculation of fluorescence decay parameters

The PL decay curves of 20% Zn-doped and pristine perovskite NCs can be fitted by the following triple-exponential decay function

$$I(t) = A_1 \exp(-t / \tau_1) + A_2 \exp(-t / \tau_2) + A_3 \exp(-t / \tau_3) \quad (1)$$

where  $A_1$ ,  $A_2$ ,  $A_3$  are the weight factor of different decay channels and  $\tau_1$ ,  $\tau_2$  and  $\tau_3$  are the corresponding decay lifetime constants. Based on these decay parameters, the average lifetime can be determined as

$$\tau_{ave} = \frac{A_1\tau_1^2 + A_2\tau_2^2 + A_3\tau_3^2}{A_1\tau_1 + A_2\tau_2 + A_3\tau_3} \quad (2)$$
